# Supplementary material for: Response-shift effects in neuromyelitis optica spectrum disorder: a secondary analysis of clinical trial data
Source: Springer Nature journal article supplement (doi:10.1007/s11136-020-02707-y), 2020-12-02
Supplement: 11136_2020_2707_MOESM1_ESM.pdf [file 11136_2020_2707_MOESM1_ESM.pdf]

| <b>Supplemental Table 1. Results of Principal Components Matrix of QOL Domain Scores<sup>†*</sup></b> |                               |      |
|-------------------------------------------------------------------------------------------------------|-------------------------------|------|
|                                                                                                       | Loading                       |      |
| EQ-5D VAS Score                                                                                       | 0.74                          |      |
| SF-36™ Bodily Pain                                                                                    | 0.71                          |      |
| SF-36™ General Health                                                                                 | 0.69                          |      |
| SF-36™ Mental Health                                                                                  | 0.70                          |      |
| SF-36™ Physical Functioning                                                                           | 0.68                          |      |
| SF-36™ Role Emotional                                                                                 | 0.74                          |      |
| SF-36™ Role Physical                                                                                  | 0.82                          |      |
| SF-36™ Social Functioning                                                                             | 0.82                          |      |
| SF-36™ Vitality                                                                                       | 0.76                          |      |
|                                                                                                       | <i>Eigenvalue</i>             | 4.95 |
|                                                                                                       | <i>PCA explained variance</i> | 55%  |

<sup>†</sup> All SF-36™ scores are norm-based.

\*All time points used in analysis.
